# Supplementary material for: Medical Students in Russia Evaluate the Training During the COVID-19 Pandemic: A Student Survey
Source: Research Square preprint supplement (doi:10.21203/rs.3.rs-543650/v1), 2021-08-30
Supplement: Supplementary file 1 [file 72487d3ea866cb4045b25813.pdf]

## Дистанционное обучение в медицинском образовании

### **\* - обязательный вопрос**

**1. Минобрнауки РФ рекомендовал российским вузам с 16 марта перейти на дистанционное обучение. Был ли учебный процесс в Вашем вузе переведен в дистанционный режим? \***

- ☐ Да, практически сразу
- ☐ Да, через несколько дней
- ☐ У нас только лекции стали дистанционными, практические занятия проходили в учебных зданиях/клиниках
- ☐ Нет, мы продолжили учебу в обычном режиме
- ☐ У нас началась учебная (производственная) практика, которая по планам должна была быть летом

**2. Если Ваш вуз перешел на дистанционное обучение, для Вас это был первый опыт? \***

- ☐ Да, я раньше так не учился(-лась)
- ☐ Нет, у нас и так часто применялись дистанционные технологии по отдельным темам, для контроля знаний, для отработок
- ☐ Нет, у нас по каждой дисциплине используется интернет-ресурс вуза (образовательный портал)
- ☐ Нет, я обучаюсь на массовых онлайн-курсах, созданных другими университетами

**3. Если Ваш вуз перешел к дистанционному обучению, как были организованы занятия? \***

- ☐ Ежедневно, по расписанию, связывались с преподавателями по всем дисциплинам, выполняли задания, получали оценки
- ☐ Задания давались на неделю, которые сдавали преподавателю в конце недели, получали оценку
- ☐ Контактировали с преподавателем в начале цикла, получали задания и сдавали их в конце цикла
- ☐ Другое

**4. Какие электронные образовательные технологии Ваш вуз использует в реализации дистанционного обучения? \***

- ☐ Существует специальный интернет-ресурс вуза (образовательный портал), на котором размещены все материалы для подготовки и обучения (вход только с логинами и паролями)
- ☐ У каждой кафедры имеются страницы на официальном сайте, на которых опубликованы материалы для обучения
- ☐ Обучение на массовых онлайн-курсах по отдельным дисциплинам
- ☐ Тренировки на виртуальных симуляторах (симулятор "Боткин" и др.)
- ☐ Видеоконференция (Skype, Zoom, Microsoft teams и др.)
- ☐ Социальные сети (Вконтакте, Facebook и др.)
- ☐ Мессенджеры (WhatsApp, Telegram, Viber)

- ☐ Электронная почта
- ☐ Другое

**5. Отметьте оптимальные для Вас способы учебного взаимодействия с преподавателем? \***

- ☐ Работа с учебным материалом на образовательном портале, выполнение практической работы, представленной в цифровом виде с получением отзыва от преподавателя
- ☐ Получение заданий по электронной почте и отправка результатов работы
- ☐ Обсуждение темы на вебинаре (проведение онлайн-занятий или презентаций)
- ☐ Ведение чата (обмен сообщениями по компьютерной сети в режиме реального времени)
- ☐ Видеоконференция (Skype, Zoom, Microsoft teams и др.)
- ☐ Мессенджеры (WhatsApp, Telegram, Viber и др.)
- ☐ Индивидуальные консультации по телефону
- ☐ Социальные сети (Вконтакте, Facebook и др.)
- ☐ Другое

**6. Как изменилось время на подготовку к занятиям после перехода на дистанционное обучение? \***

- ☐ Увеличилось почти вдвое
- ☐ Увеличилось на 1/3
- ☐ Не изменилось
- ☐ Уменьшилось на 1/3
- ☐ Уменьшилось почти вдвое

**7. Какие задания, выполняемые в электронном формате, по Вашему мнению, позволяют максимально эффективно освоить ту или иную дисциплину? \***

- ☐ Ответы на тесты
- ☐ Ответы на вопросы
- ☐ Решение ситуационных задач
- ☐ Решение клинических задач
- ☐ Составление тестовых заданий по теме с использованием главы учебника/клинических рекомендаций
- ☐ Написание эссе, реферата
- ☐ Составление проекта (программы исследования)
- ☐ Интерпретация данных инструментальной диагностики (ЭКГ, рентгенография, КТ, МРТ и др.)
- ☐ Интерпретация данных лабораторной диагностики (ОАК, ОАМ, биохимический анализ крови и др.)
- ☐ Написание обзора литературы по теме
- ☐ Другое

**8. Вы или кто-то известный Вам помогали преподавателям организовать дистанционное обучение? \***

- ☐ Да
- ☐ Нет
- ☐ Не знаю

**9. Если помогали, то напишите в чем именно заключалась эта помощь, если нет - оставьте вопрос без ответа**

**10. Нравится ли Вам проходить обучение с помощью дистанционных образовательных технологий (ДОТ)? \***

- ☐ Да
- ☐ Нет
- ☐ Когда как
- ☐ Затрудняюсь ответить

**11. Если Вам не нравится проходить обучение с помощью ДОТ – назовите причины, если нравится – оставьте вопрос без ответа \***

- ☐ У меня не всегда есть доступ к интернету
- ☐ Такой формат обучения требует много времени
- ☐ Несовершенные электронные ресурсы, плохо структурированные материалы, слабые задания и тесты
- ☐ Преподаватели плохо владеют современными технологиями, у них гораздо лучше получается обучать в аудитории, «глаза в глаза»
- ☐ Недостаточно хорошо владею ПК (персональным компьютером)
- ☐ Считаю, что медицинское образование может осуществляться только путем очного проведения практического занятия/лекции
- ☐ Другое

**11. Если Вам не нравится проходить обучение с помощью ДОТ – назовите причины, если нравится – оставьте вопрос без ответа**

- ☐ У меня не всегда есть доступ к интернету
- ☐ Такой формат обучения требует много времени
- ☐ Несовершенные электронные ресурсы, плохо структурированные материалы, слабые задания и тесты
- ☐ Преподаватели плохо владеют современными технологиями, у них гораздо лучше получается обучать в аудитории, «глаза в глаза»
- ☐ Недостаточно хорошо владею ПК (персональным компьютером)
- ☐ Считаю, что медицинское образование может осуществляться только путем очного проведения практического занятия/лекции
- ☐ Другое

**12. Если Вам нравится обучение с ДОТ, то напишите почему? Если не нравится – оставьте вопрос без ответа**

**13. Как Вы можете оценить уровень своих знаний по гуманитарным дисциплинам, полученных во время электронного обучения при помощи дистанционных технологий по шкале от 1 до 10, где 1 – очень низко, 10 – очень высоко, (0 - не изучались) \***

|   |   |   |   |   |   |   |   |   |   |    |
|---|---|---|---|---|---|---|---|---|---|----|
| 0 | 1 | 2 | 3 | 4 | 5 | 6 | 7 | 8 | 9 | 10 |
|---|---|---|---|---|---|---|---|---|---|----|

**14. Как Вы можете оценить уровень своих знаний по фундаментальным дисциплинам, полученных во время электронного обучения при помощи дистанционных технологий по шкале от 1 до 10, где 1 – очень низко, 10 – очень высоко, (0 - не изучались) \***

|   |   |   |   |   |   |   |   |   |   |    |
|---|---|---|---|---|---|---|---|---|---|----|
| 0 | 1 | 2 | 3 | 4 | 5 | 6 | 7 | 8 | 9 | 10 |
|---|---|---|---|---|---|---|---|---|---|----|

**15. Как Вы можете оценить уровень своих знаний по клиническим дисциплинам, полученных во время электронного обучения при помощи дистанционных технологий по шкале от 1 до 10, где 1 – очень низко, 10 – очень высоко, (0 - не изучались) \***

|   |   |   |   |   |   |   |   |   |   |    |
|---|---|---|---|---|---|---|---|---|---|----|
| 0 | 1 | 2 | 3 | 4 | 5 | 6 | 7 | 8 | 9 | 10 |
|---|---|---|---|---|---|---|---|---|---|----|

**16. Как, по Вашему мнению, дистанционные образовательные технологии влияют на образовательный процесс? \***

- ☐ Позволяют легко и удобно отрабатывать пропущенные занятия
- ☐ Позволяют легко и удобно отрабатывать пропущенные лекции
- ☐ Экономят время и деньги, меньше переездов
- ☐ Позволяют осваивать материал в индивидуальном темпе: кому-то для разбора лекции необходимо 1,5 часа, кому-то хватает 30 минут
- ☐ Дают возможность проверить свои знания (пройти тест по пройденной теме)
- ☐ Развивают навыки самоконтроля
- ☐ Отрывают обучение от освоения практических умений: лабораторий, экспериментов
- ☐ Клиническое обучение превращается в отсутствие работы с пациентами в сходастику
- ☐ Увеличивают затраты студентов на приобретение продвинутых гаджетов, пользование интернета
- ☐ Позволяют преподавателям заменить обучение студентов простой отсылкой к литературе
- ☐ Затрудняюсь ответить
- ☐ Другое

**17. Как Вы считаете, нужно ли оставить ДОТ после завершения ситуации с коронавирусной инфекцией? \***

- ☐ Да, однозначно
- ☐ Да, по отдельным дисциплинам
- ☐ Да, можно лекции сделать дистанционными

- ☐ Скорее нет, без работы в классе, лаборатории снижается эффективность обучения
- ☐ Нет, мне сложно работать самостоятельно, без постоянного контроля преподавателя
- ☐ Нет, получая медицинское образование, учиться дистанционно невозможно, надо находиться в клинике
- ☐ Затрудняюсь ответить

**18. Есть ли у Вас предложения/пожелания по улучшению качества дистанционного обучения? Если да - напишите, если нет - оставьте вопрос без ответа**

**19. За время действия требований по предотвращению рисков распространения коронавирусной инфекции приходилось ли Вам бывать в клиниках/поликлиниках?\***

- ☐ Да, у нас были практические занятия
- ☐ Да, у нас была практика
- ☐ Да, нас направляли на помощь медицинским работникам
- ☐ Да, я волонтер — медик
- ☐ Нет, не был(-а)

**20. Оцените, пожалуйста, частоту применения различных форм обучения в Вашем вузе \***

| <b>№<br/>п/п</b> | <b>Форма обучения</b>                                                                    | <b>Часто</b> | <b>Редко</b> | <b>Никогда</b> |
|------------------|------------------------------------------------------------------------------------------|--------------|--------------|----------------|
| <b>1.</b>        | Лекции                                                                                   |              |              |                |
| <b>2.</b>        | Семинарские занятия                                                                      |              |              |                |
| <b>3.</b>        | Лабораторные,<br>экспериментальные работы                                                |              |              |                |
| <b>4.</b>        | Групповая работа над проектами, выполнением заданий                                      |              |              |                |
| <b>5.</b>        | Работа в анатомическом зале с кадаверным (трупным) материалом, в секционных залах и т.д. |              |              |                |
| <b>6.</b>        | Электронное обучение с применением дистанционных технологий                              |              |              |                |
| <b>7.</b>        | Тренинги на манекенах и симуляторах                                                      |              |              |                |
| <b>8.</b>        | Индивидуальная работа над проектами                                                      |              |              |                |
| <b>9.</b>        | Эксперименты                                                                             |              |              |                |
| <b>10.</b>       | Работа с пациентами в стационаре                                                         |              |              |                |
| <b>11.</b>       | Работа с пациентами в поликлинике                                                        |              |              |                |

**21. Как Вы оцениваете качество современного медицинского образования в России в целом? \***

- ☐ Высокое
- ☐ Среднее
- ☐ Низкое
- ☐ Затрудняюсь ответить

**22. Какой тип устройства Вы чаще всего используете для электронного обучения? \***

- ☐ Планшет
- ☐ Ноутбук
- ☐ Мобильный телефон
- ☐ Персональный компьютер (ПК)

**23. Выберите свой вуз \***

- ☐ Алтайский государственный медицинский университет
- ☐ Амурская государственная медицинская академия
- ☐ Астраханский государственный медицинский университет
- ☐ Башкирский государственный медицинский университет
- ☐ Волгоградский государственный медицинский университет
- ☐ Воронежский государственный медицинский университет имени Н.Н.Бурденко
- ☐ Дагестанский государственный медицинский университет
- ☐ Дальневосточный государственный медицинский университет
- ☐ Ивановская государственная медицинская академия
- ☐ Ижевская государственная медицинская академия
- ☐ Иркутский государственный медицинский университет
- ☐ Казанский государственный медицинский университет
- ☐ Кемеровский государственный медицинский университет
- ☐ Кировский государственный медицинский университет
- ☐ Красноярский государственный медицинский университет им.проф. В.Ф. Войно-Ясенецкого
- ☐ Кубанский государственный медицинский университет
- ☐ Курский государственный медицинский университет
- ☐ Московский государственный медико-стоматологический университет имени А.И. Евдокимова
- ☐ Новосибирский государственный медицинский университет
- ☐ Омский государственный медицинский университет
- ☐ Оренбургский государственный медицинский университет
- ☐ Первый Московский государственный медицинский университет имени И.М. Сеченова
- ☐ Первый Санкт-Петербургский государственный медицинский университет имени академика И.П. Павлова
- ☐ Пермская государственная фармацевтическая академия
- ☐ Пермский государственный медицинский университет имени академика Е.А. Вагнера
- ☐ Приволжский исследовательский медицинский университет
- ☐ Пятигорский медико-фармацевтический институт (филиал ВолГМУ)
- ☐ Российский национальный исследовательский медицинский университет имени Н.И. Пирогова

- ☐ Ростовский государственный медицинский университет
- ☐ Рязанский государственный медицинский университет имени академика И.П. Павлова
- ☐ Самарский государственный медицинский университет
- ☐ Санкт-Петербургская государственная химико-фармацевтическая академия
- ☐ Санкт-Петербургский государственный педиатрический медицинский университет
- ☐ Саратовский государственный медицинский университет имени В.И. Разумовского
- ☐ Северный государственный медицинский университет
- ☐ Северо-Западный государственный медицинский университет им. И.И. Мечникова
- ☐ Северо-Осетинская государственная медицинская академия
- ☐ Сибирский государственный медицинский университет
- ☐ Смоленский государственный медицинский университет
- ☐ Ставропольский государственный медицинский университет
- ☐ Тверской государственный медицинский университет
- ☐ Тихоокеанский государственный медицинский университет
- ☐ Тюменский государственный медицинский университет
- ☐ Уральский государственный медицинский университет
- ☐ Читинская государственная медицинская академия
- ☐ Южно-Уральский государственный медицинский университет
- ☐ Ярославский государственный медицинский университет

**24. Выберите свою специальность \***

- ☐ Лечебное дело
- ☐ Педиатрия
- ☐ Медико-профилактическое дело
- ☐ Стоматология
- ☐ Фармация
- ☐ Медицинская биохимия
- ☐ Медицинская биофизика
- ☐ Медицинская психология
- ☐ Медицинская кибернетика
- ☐ Сестринское дело
- ☐ Социальная работа

**25. Ваш курс \***

- ☐ 1
- ☐ 2
- ☐ 3
- ☐ 4
- ☐ 5
- ☐ 6



## 26. Основа обучения \*

- ☐ Бюджет
- ☐ Коммерция

## 27. Пол \*

- ☐ Мужской
- ☐ Женский

### Distance learning in Medical Education

#### \* - compulsory question

**1. The Ministry of Education and Science of the Russian Federation recommended that Russian universities switch to distance learning from March 16. Has the educational process at your university been switched to a distance learning mode? \***

- ☐ Yes, almost immediately
- ☐ Yes, in a few days
- ☐ We only had lectures become remote, practical classes were held in academic buildings/clinics
- ☐ No, we continued to study as usual
- ☐ We started practical (work placement) training, which was scheduled to be in the summer

**2. If your university switched to distance learning, was this the first experience for you? \***

- ☐ Yes, I haven't studied this way before
- ☐ No, we already often used distance technology for certain topics, to assess knowledge, to do reworks
- ☐ No, we use the university's online resource (educational portal) for each discipline
- ☐ No, I study on mass online courses created by other universities

**3. If your university has switched to distance learning, how were the classes organized? \***

- ☐ Every day according to the schedule. We were in contact with the teachers for all disciplines, completed assignments and received grades
- ☐ Assignments were given for the week, which were handed back to the instructor at the end of the week. Then we received a grade
- ☐ We contacted the instructor at the beginning of the course, received assignments and turned them back at the end of the cycle
- ☐ Other

**4. What electronic educational technologies does your university use in the implementation of distance learning? \***

- There is a special Internet-resource of the university (educational portal) where all materials for preparation and training are placed (login and password access only)
- Each department has pages on the official website where materials for training are published
- Training on mass online courses for individual disciplines
- Training on virtual simulators (Botkin simulator, etc.)
- Video conferencing (Skype, Zoom, Microsoft teams, etc.)
- Social networks (Vkontakte, Facebook, etc.)
- Messengers (WhatsApp, Telegram, Viber)
- Email
- Other

**5. What is the best way for you to interact with your teacher? \***

Working with the learning material on the educational portal, doing practical work presented digitally and getting feedback from the instructor

Receiving assignments by email and sending the results of the work

Discussing a topic in a webinar (leading an online class or presentation)

Chatting (real-time computer networking)

Video conferencing (Skype, Zoom, Microsoft teams, etc.)

Messengers (WhatsApp, Telegram, Viber, etc.)

Individual consultations by phone

Social networks (Vkontakte, Facebook, etc.)

Other

**6. How has the time to prepare for classes changed since you switched to distance learning? \***

\*

☐ Almost doubled

☐ Increased by 1/3

☐ No change

☐ Decreased by 1/3

☐ Almost halved

**7. In your opinion, what electronic assignments are the most effective in mastering a particular discipline? \***

Answering MCQs

Answering open-ended questions

Case problem solving

Clinical problem solving

Composing test questions on the topic, using the textbook chapter/clinical guidelines

Essay or paper writing

Development of the project (research program)

Interpretation of the data of instrumental diagnostics (ECG, X-ray, CT, MRI, etc.)

Interpretation of laboratory diagnostics data (CBC, UA, blood chemistry, etc.)

Writing a literature review on the topic

Other

**8. Did you or someone you know help teachers organize distance learning? \***

☐ Yes

☐ No

☐ Don't know

**9. If you helped, then write exactly what that help was, if not - leave the question unanswered**

|  |
|--|
|  |
|--|

**10. Do you like to study with the help of distance learning technologies (DLT)? \***

☐ Yes

☐ No

☐ It depends

☐ It is difficult to answer

**11. If you don't like to be taught using the DLT, name your reasons, and if you do, leave the question unanswered \***

I don't always have access to the internet

This format is time-consuming

Imperfect electronic resources, poorly structured materials, weak assignments and tests

Teachers are bad at using modern technology, they are much better at teaching in a classroom “eye to eye”

I am not confident enough with PC (personal computer)

I believe that medical education can only take place through a face-to-face practical class/lecture

Other

**12. If you like teaching with the DLT, please specify why? If you don't like it, leave the question unanswered**

|  |
|--|
|  |
|--|

**13. How can you rate the level of your knowledge of humanities obtained during e-learning with the help of distance technologies on a scale of 1 to 10, where 1 is very low, 10 is very high, (0 - not studied) \***

|   |   |   |   |   |   |   |   |   |   |    |
|---|---|---|---|---|---|---|---|---|---|----|
| 0 | 1 | 2 | 3 | 4 | 5 | 6 | 7 | 8 | 9 | 10 |
|---|---|---|---|---|---|---|---|---|---|----|

**14. How can you rate the level of your knowledge in fundamental disciplines obtained during e-learning with the help of distance technologies on a scale of 1 to 10, where 1 is very low, 10 is very high, (0 - not studied) \***

|   |   |   |   |   |   |   |   |   |   |    |
|---|---|---|---|---|---|---|---|---|---|----|
| 0 | 1 | 2 | 3 | 4 | 5 | 6 | 7 | 8 | 9 | 10 |
|---|---|---|---|---|---|---|---|---|---|----|

**15. How can you rate the level of your knowledge of clinical disciplines obtained during e-learning using distance technology on a scale of 1 to 10, where 1 is very low, 10 is very high, (0 - not studied) \***

|   |   |   |   |   |   |   |   |   |   |    |
|---|---|---|---|---|---|---|---|---|---|----|
| 0 | 1 | 2 | 3 | 4 | 5 | 6 | 7 | 8 | 9 | 10 |
|---|---|---|---|---|---|---|---|---|---|----|

**16. How, in your opinion, do distance learning technologies affect the educational process? \***

Allow you to easily and conveniently repeat missed classes

Allow an easy and convenient repetition of missed lectures

Save time and money on travel

Allow you to master the material at your own pace: some people need 1.5 hours to work through a lecture, while others need only 30 minutes.

Give you the opportunity to check your knowledge (take a quiz on the lecture topic you have just attended).

Develop self-control skills

Detach learning from mastering practical skills: laboratories, experiments

Clinical training turns into scholasticism in the absence of working with patients.

Increase student spending on advanced gadgets, internet use

Allow professors to replace student learning with simple reference to literature

Difficult to answer

Other

**17. Do you think DLT should be maintained after the coronavirus outbreak is over? \***

- ☐ Yes, definitely
- ☐ Yes, for certain disciplines
- ☐ Yes, lectures can become remote
- ☐ Rather no, no classroom or laboratory activities reduces the effectiveness of learning
- ☐ No, it is difficult for me to work independently without constant supervision of the instructor
- ☐ No, while receiving medical education, it is impossible to study remotely, you have to be present in a clinic
- ☐ It is difficult to answer

**18. Do you have any suggestions/wishes to improve the quality of distance learning? If yes - write, if no - leave the question unanswered**

**19. Did you have any encounters in clinics/policlinics during the time of the Coronavirus Risk Prevention activities,?**

- ☐ Yes, we had practical classes
- ☐ Yes, we had practical training
- ☐ Yes, we were sent to assist medical professionals
- ☐ Yes, I am a medical volunteer
- ☐ No, I was not

**20. Please estimate the frequency of use of various forms of training at your institution \***

| <b>№</b>   | <b>Form of training</b>                                                              | <b>Frequently</b> | <b>Seldom</b> | <b>Never</b> |
|------------|--------------------------------------------------------------------------------------|-------------------|---------------|--------------|
| <b>1.</b>  | Lectures                                                                             |                   |               |              |
| <b>2.</b>  | Seminars                                                                             |                   |               |              |
| <b>3.</b>  | Laboratory, experimental works                                                       |                   |               |              |
| <b>4.</b>  | Group work on projects and assignments                                               |                   |               |              |
| <b>5.</b>  | Work in the anatomy laboratory with cadaveric material, in the sectional halls, etc. |                   |               |              |
| <b>6.</b>  | E-learning with the use of distance technologies                                     |                   |               |              |
| <b>7.</b>  | Training on manikins and simulators                                                  |                   |               |              |
| <b>8.</b>  | Independent work on the projects                                                     |                   |               |              |
| <b>9.</b>  | Experiments                                                                          |                   |               |              |
| <b>10.</b> | Work with patients in clinics                                                        |                   |               |              |
| <b>11.</b> | Work with patients in outpatient setting                                             |                   |               |              |

**21. How do you assess the quality of modern medical education in Russia in general? \***

- ☐ High
- ☐ Medium
- ☐ Low
- ☐ It is difficult to answer

**22. What type of device do you use most often for e-learning? \***

- ☐ Tablet
- ☐ Laptop
- ☐ Mobile phone
- ☐ Personal computer (PC)

**23. Choose your university \***

- ☐ Altai State Medical University
- ☐ Amur State Medical Academy
- ☐ Astrakhan State Medical University
- ☐ Bashkir State Medical University
- ☐ Volgograd State Medical University
- ☐ Burdenko Voronezh State Medical University
- ☐ Dagestan State Medical University
- ☐ Far Eastern State Medical University
- ☐ Ivanovo State Medical Academy
- ☐ Izhevsk State Medical Academy
- ☐ Irkutsk State Medical University
- ☐ Kazan State Medical University
- ☐ Kemerovo State Medical University
- ☐ Kirov State Medical University
- ☐ Krasnoyarsk State Medical University named after Prof. V.F. Voyno-Yasenetsky
- ☐ Kuban State Medical University
- ☐ Kursk State Medical University
- ☐ A.I. Evdokimov Moscow State University of Medicine and Dentistry
- ☐ Novosibirsk State Medical University
- ☐ Omsk State Medical University
- ☐ Orenburg State Medical University

- ☐ First Moscow State Medical University named after I.M. Sechenov
- ☐ First I.P. Pavlov St. Petersburg State Medical University
- ☐ Perm State Pharmaceutical Academy
- ☐ E.A. Wagner Perm State Medical University
- ☐ Volga Region Research Medical University
- ☐ Pyatigorsk Medical and Pharmaceutical Institute (VolgGMU branch)
- ☐ Pirogov Russian National Research Medical University
- ☐ Rostov State Medical University
- ☐ I.P. Pavlov Ryazan State Medical University
- ☐ Samara State Medical University
- ☐ St. Petersburg State Chemical and Pharmaceutical Academy
- ☐ St. Petersburg State Pediatric Medical University
- ☐ Saratov V.I. Razumovsky State Medical University
- ☐ Northern State Medical University
- ☐ Northwestern State Medical University named after I.I. Mechnikov
- ☐ North Ossetian State Medical Academy
- ☐ Siberian State Medical University
- ☐ Smolensk State Medical University
- ☐ Stavropol State Medical University
- ☐ Tver State Medical University
- ☐ Pacific State Medical University
- ☐ Tyumen State Medical University
- ☐ Urals State Medical University
- ☐ Chita State Medical Academy
- ☐ South Ural State Medical University
- ☐ Yaroslavl State Medical University

**24. Choose your specialty \***

- ☐ Medicine
- ☐ Pediatrics
- ☐ Preventive medicine
- ☐ Dentistry
- ☐ Pharmacy
- ☐ Medical Biochemistry
- ☐ Medical Biophysics
- ☐ Medical Psychology
- ☐ Medical Cybernetics
- ☐ Nursing
- ☐ Social work

**25. Year of studies \***

- ☐ 1
- ☐ 2
- ☐ 3
- ☐ 4
- ☐ 5
- ☐ 6

**26. Basis of learning \***

- ☐ Budget
- ☐ Commerce

**27. Gender \***

- ☐ Male
- ☐ Female
